# Supplementary material for: Genetic diversity of thrips populations on Allium species around the world
Source: PLoS One. 2023 Aug 17;18(8):e0289984. doi: 10.1371/journal.pone.0289984 (PMC10434924; doi:10.1371/journal.pone.0289984)
Supplement: S4 Table — The different COI fragments are grouped per reproductive type. (XLSX) [file pone.0289984.s006.xlsx]

## Sheet: S4_Table
	Heteroplasmic haplotypes fragments	Nucleotide position considering the thelytokous fragment as a reference
		1	2	3	4	5	6	7	8	9	10	11	12	13	14	15	16	17	18	19	20	21	22	23	24	25	26	27	28	29	30	31	32	33	34	35	36	37	38	39	40	41	42	43	44	45	46	47	48
	H8 Arrhenotokous	-	-	-	-	-	-	-	-	-	-	-	-	-	-	-	-	-	-	-	-	-	-	-	-	-	-	-	-	-	-	-	-	-	-	-	-	-	-	-	-	-	-	-	-	-	-	-	-
	H10 Arrhenotokous	-	-	-	-	-	-	-	-	-	-	-	-	-	-	-	-	-	-	-	-	-	-	-	-	-	-	-	-	-	-	-	-	-	-	-	-	-	-	-	-	-	-	-	-	-	-	-	-
	H11 Arrhenotokous	-	-	-	-	-	-	-	-	-	-	-	-	-	-	-	-	-	-	-	-	-	-	-	-	-	-	-	-	-	-	-	-	-	-	-	-	-	-	-	-	-	-	-	-	-	-	-	-
	H12 Arrhenotokous	-	-	-	-	-	-	-	-	-	-	-	-	-	-	-	-	-	-	-	-	-	-	-	-	-	-	-	-	-	-	-	-	-	-	-	-	-	-	-	-	-	-	-	-	-	-	-	-
	H13 Arrhenotokous	-	-	-	-	-	-	-	-	-	-	-	-	-	-	-	-	-	-	-	-	-	-	-	-	-	-	-	-	-	-	-	-	-	-	-	-	-	-	-	-	-	-	-	-	-	-	-	-
	H16 Arrhenotokous	-	-	-	-	-	-	-	-	-	-	-	-	-	-	-	-	-	-	-	-	-	-	-	-	-	-	-	-	-	-	-	-	-	-	-	-	-	-	-	-	-	-	-	-	-	-	-	-
	H17 Arrhenotokous	-	-	-	-	-	-	-	-	-	-	-	-	-	-	-	-	-	-	-	-	-	-	-	-	-	-	-	-	-	-	-	-	-	-	-	-	-	-	-	-	-	-	-	-	-	-	-	-
	H19 Arrhenotokous	-	-	-	-	-	-	-	-	-	-	-	-	-	-	-	-	-	-	-	-	-	-	-	-	-	-	-	-	-	-	-	-	-	-	-	-	-	-	-	-	-	-	-	-	-	-	-	-
	H21 Arrhenotokous	-	-	-	-	-	-	-	-	-	-	-	-	-	-	-	-	-	-	-	-	-	-	-	-	-	-	-	-	-	-	-	-	-	-	-	-	-	-	-	-	-	-	-	-	-	-	-	-
	H22 Arrhenotokous	-	-	-	-	-	-	-	-	-	-	-	-	-	-	-	-	-	-	-	-	-	-	-	-	-	-	-	-	-	-	-	-	-	-	-	-	-	-	-	-	-	-	-	-	-	-	-	-
	H25 Arrhenotokous	-	-	-	-	-	-	-	-	-	-	-	-	-	-	-	-	-	-	-	-	-	-	-	-	-	-	-	-	-	-	-	-	-	-	-	-	-	-	-	-	-	-	-	-	-	-	-	-
	H26 Arrhenotokous	-	-	-	-	-	-	-	-	-	-	-	-	-	-	-	-	-	-	-	-	-	-	-	-	-	-	-	-	-	-	-	-	-	-	-	-	-	-	-	-	-	-	-	-	-	-	-	-
	H28 Arrhenotokous	-	-	-	-	-	-	-	-	-	-	-	-	-	-	-	-	-	-	-	-	-	-	-	-	-	-	-	-	-	-	-	-	-	-	-	-	-	-	-	-	-	-	-	-	-	-	-	-
	H29 Arrhenotokous	-	-	-	-	-	-	-	-	-	-	-	-	-	-	-	-	-	-	-	-	-	-	-	-	-	-	-	-	-	-	-	-	-	-	-	-	-	-	-	-	-	-	-	-	-	-	-	-
	H30 Arrhenotokous	-	-	-	-	-	-	-	-	-	-	-	-	-	-	-	-	-	-	-	-	-	-	-	-	-	-	-	-	-	-	-	-	-	-	-	-	-	-	-	-	-	-	-	-	-	-	-	-
	H31 Arrhenotokous	-	-	-	-	-	-	-	-	-	-	-	-	-	-	-	-	-	-	-	-	-	-	-	-	-	-	-	-	-	-	-	-	-	-	-	-	-	-	-	-	-	-	-	-	-	-	-	-
	H32 Arrhenotokous	-	-	-	-	-	-	-	-	-	-	-	-	-	-	-	-	-	-	-	-	-	-	-	-	-	-	-	-	-	-	-	-	-	-	-	-	-	-	-	-	-	-	-	-	-	-	-	-
	H33 Arrhenotokous	-	-	-	-	-	-	-	-	-	-	-	-	-	-	-	-	-	-	-	-	-	-	-	-	-	-	-	-	-	-	-	-	-	-	-	-	-	-	-	-	-	-	-	-	-	-	-	-
	H47 Arrhenotokos	-	-	-	-	-	-	-	-	-	-	-	-	-	-	-	-	-	-	-	-	-	-	-	-	-	-	-	-	-	-	-	-	-	-	-	-	-	-	-	-	-	-	-	-	-	-	-	-
	H51 Arrhenotokous	-	-	-	-	-	-	-	-	-	-	-	-	-	-	-	-	-	-	-	-	-	-	-	-	-	-	-	-	-	-	-	-	-	-	-	-	-	-	-	-	-	-	-	-	-	-	-	-
	H54 Arrhenotokous	-	-	-	-	-	-	-	-	-	-	-	-	-	-	-	-	-	-	-	-	-	-	-	-	-	-	-	-	-	-	-	-	-	-	-	-	-	-	-	-	-	-	-	-	-	-	-	-
	H8 Thelytokous	-	A	A	A	G	G	G	G	G	T	T	T	T	T	C	C	C	T	T	T	A	T	C	A	A	C	G	T	T	T	T	A	T	C	A	T	T	C	A	G	G	A	C	C	T	T	C	A
	H10 Thelytokous	-	-	C	A	G	G	A	A	A	T	A	T	C	C	A	C	C	T	T	T	A	T	C	A	A	C	G	T	T	T	T	A	T	C	A	T	T	C	A	G	G	A	C	C	T	T	C	A
	H11 Thelytokous	-	T	A	A	A	A	A	C	A	A	A	A	A	T	T	A	C	T	T	T	A	T	C	A	A	C	G	T	T	T	T	A	T	C	A	T	T	C	A	G	G	A	C	C	T	T	C	A
	H12 Thelytokous	-	A	A	C	A	A	G	G	T	A	A	A	T	C	A	C	C	T	T	T	A	T	C	A	A	C	G	T	T	T	T	A	T	C	A	T	T	C	A	G	G	A	C	C	T	T	C	A
	H13 Thelytokous	-	-	-	-	-	-	-	-	-	-	-	-	-	-	-	-	C	T	T	T	A	T	C	A	A	C	G	T	T	T	T	A	T	C	A	T	T	C	A	G	G	A	C	C	T	T	C	A
	H16 Thelytokous	-	-	A	A	C	G	G	T	T	T	T	T	T	C	-	C	C	T	T	T	A	T	C	A	A	C	G	T	T	T	T	A	T	C	A	T	T	C	A	G	G	A	C	C	T	T	C	A
	H17 Thelytokous	-	G	A	A	C	A	G	T	A	T	A	T	C	C	A	C	C	T	T	T	A	T	C	A	A	C	G	T	T	T	T	A	T	C	A	T	T	C	A	G	G	A	C	C	T	T	C	A
	H19 Thelytokous	-	-	-	-	-	-	-	-	-	-	-	-	-	-	-	-	-	-	-	-	-	-	-	-	-	-	-	-	-	-	-	-	T	T	C	G	G	T	C	A	G	G	A	C	T	T	C	A
	H20 Thelytokous	-	A	A	A	A	A	A	A	T	T	A	A	T	C	-	A	C	T	T	T	A	T	C	A	A	C	G	T	T	T	T	A	T	C	A	T	T	C	A	G	G	A	C	C	T	T	C	A
	H21 Thelytokous	-	A	A	A	A	A	G	G	A	A	A	T	T	C	A	C	C	T	T	T	A	T	C	A	A	C	G	T	T	T	T	A	T	C	A	T	T	C	A	G	G	A	C	C	T	T	C	A
	H22 Thelytokous	-	-	-	-	-	-	G	A	T	A	A	T	C	C	A	C	C	T	T	T	A	T	C	A	A	C	G	T	T	T	T	A	T	C	A	T	T	C	A	G	G	A	C	C	T	T	C	A
	H25 Thelytokous	-	A	A	C	C	A	G	G	T	A	A	T	T	C	A	C	-	T	T	T	A	T	C	A	A	C	G	T	T	T	T	A	T	C	A	T	T	C	A	G	G	A	C	C	T	T	C	A
	H26 Thelytokous	-	-	-	-	-	-	C	T	T	T	T	T	T	T	C	A	C	T	T	T	A	T	C	A	A	C	G	T	T	T	T	A	T	C	A	T	T	C	A	G	G	A	C	C	T	T	C	A
	H27 Thelytokous	-	-	A	C	A	A	G	G	-	A	A	A	T	T	A	C	C	T	T	T	A	T	C	A	A	C	G	T	T	T	T	A	T	C	A	T	T	C	A	G	G	A	C	C	T	T	C	A
	H28 Thelytokous	-	-	A	C	A	A	G	G	T	A	A	A	T	C	A	C	C	T	T	T	A	T	C	A	A	C	G	T	T	T	T	A	T	C	A	T	T	C	A	G	G	A	C	C	T	T	C	A
	H29 Thelytokous	-	A	A	C	A	G	G	G	T	A	A	T	T	C	A	C	-	T	T	T	A	T	C	A	A	C	G	T	T	T	T	A	T	C	A	T	T	C	A	G	G	A	C	C	T	T	C	A
	H30 Thelytokous	-	A	A	A	A	A	A	A	A	A	A	A	T	C	-	C	C	T	T	T	A	T	C	A	A	C	G	T	T	T	T	A	T	C	A	T	T	C	A	G	G	A	C	C	T	T	C	A
	H31 Thelytokous	G	A	A	A	C	A	G	G	T	T	T	T	T	C	-	C	C	T	T	T	A	T	C	A	A	C	G	T	T	T	T	A	T	C	A	T	T	C	A	G	G	A	C	C	T	T	C	A
	H32 Thelytokous	-	A	A	A	A	A	A	T	T	T	T	A	A	C	C	C	C	T	T	T	A	T	C	A	A	C	G	T	T	T	T	A	T	C	A	T	T	C	A	G	G	A	C	C	T	T	C	A
	H33 Thelytokous	A	A	A	A	A	A	A	A	A	A	A	A	T	C	-	A	C	T	T	T	A	T	C	A	A	C	G	T	T	T	T	A	T	C	A	T	T	C	A	G	G	A	C	C	T	T	C	A
	H48 Thelytokous	-	-	-	-	-	-	-	-	-	T	C	C	A	C	C	T	T	T	A	T	C	A	C	A	C	G	A	T	T	T	T	A	T	C	A	T	T	C	A	G	G	A	C	C	T	T	C	A
	H51 Thelytokous	-	A	A	A	A	A	A	A	T	T	T	A	T	T	C	A	C	T	T	T	A	T	C	A	A	C	G	T	T	T	T	A	T	C	A	T	T	C	A	G	G	A	C	C	T	T	C	A
	H54 Thelytokous	-	-	A	A	A	A	G	G	G	T	T	T	T	T	T	A	C	T	T	T	A	T	C	A	A	C	G	T	T	T	T	A	T	C	A	T	T	C	A	G	G	A	C	C	T	T	C	A
[truncated: 408 more columns]
